# Supplementary material for: Down-regulation of long non-coding RNA MEG3 suppresses osteogenic differentiation of periodontal ligament stem cells (PDLSCs) through miR-27a-3p/IGF1 axis in periodontitis
Source: publisher site journal article supplement (doi:10.18632/aging.102105), 2019-08-09
Supplement: Supplementary file [file aging-v11i15-102105-supplementary-material-SD1.pdf]

**SUPPLEMENTARY FIGURES**

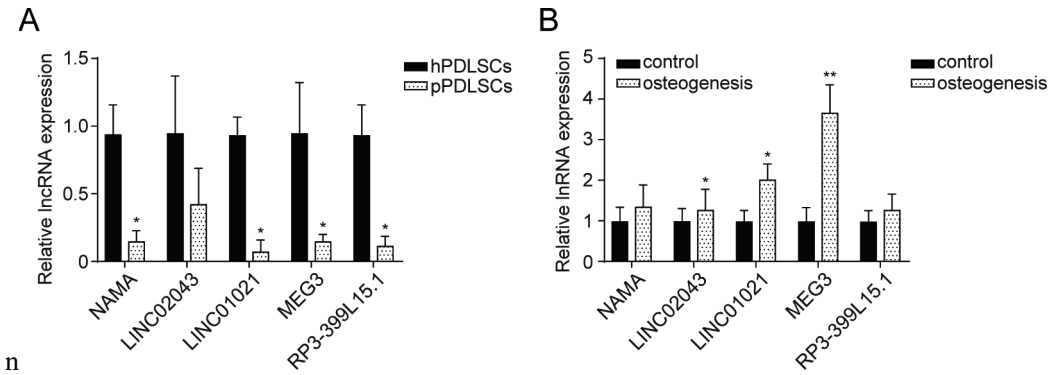

**Supplementary Figure 1. QRT-PCR of dys-regulated lncRNAs in healthy and periodontitis PDLSCs.** (A) Expression of NAMA, LINC02043, LINC01021, MEG3 and RP3-399L15.1 was down-regulated in periodontitis PDLSCs compared with that in healthy samples, and thereto MEG3 displayed the most remarkable difference. (B) After osteogenesis treatment, down-regulation of LINC02043, LINC01021, MEG3 was significantly reversed and thereto the increase of MEG3 was the most distinct. \*  $P < 0.05$ , \*\*  $P < 0.01$ , compared with the hPDLSCs or control group

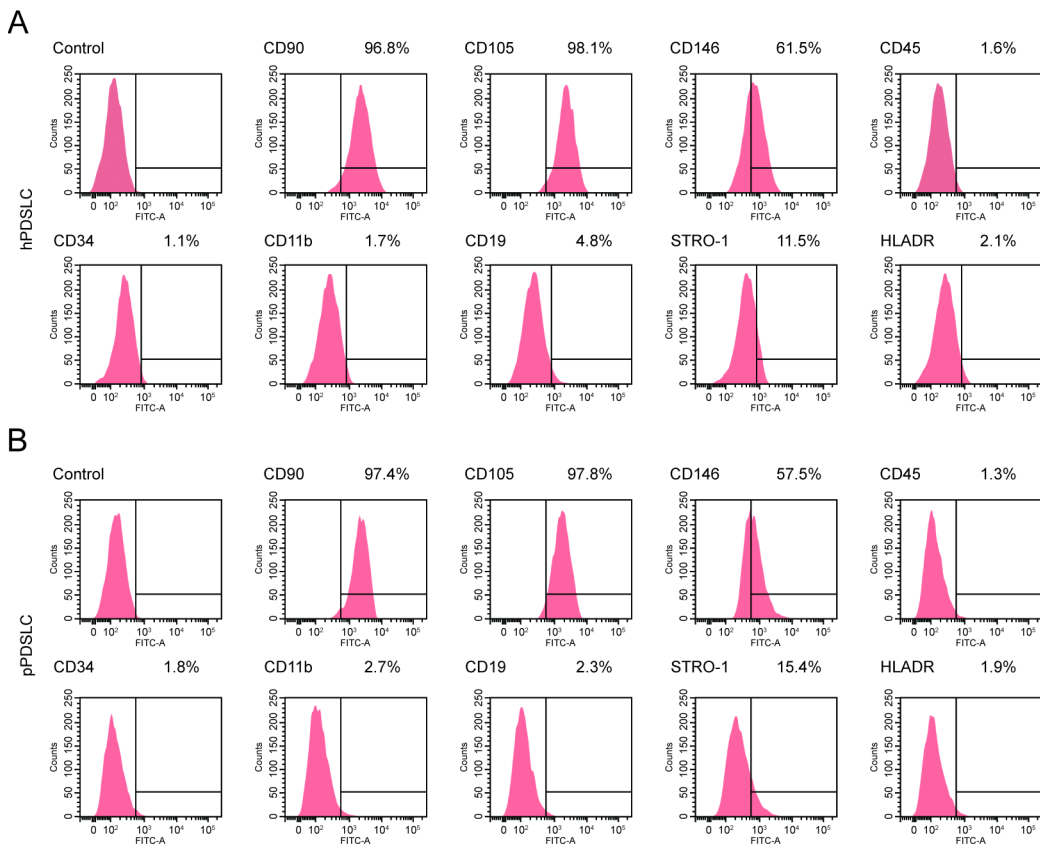

**Supplementary Figure 2. Detection of PDLSC surface antigens by flow cytometry.** (A) Expression of CD90, CD105, CD146, CD45, CD34, CD11b, CD19, STRO-1, and HLADR in hPDLSCs. (B) Expression of CD90, CD105, CD146, CD45, CD34, CD11b, CD19, STRO-1, and HLADR in pPDLSCs.

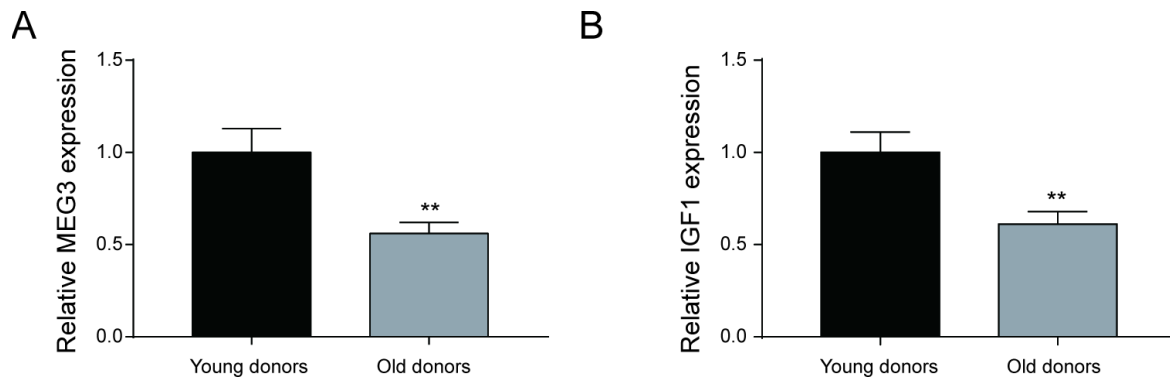

**Supplementary Figure 3. Detection of MEG3 and IGF1 in pDLSCs from old donors and young donors. (A)** Expression of MEG3 was lower in the old donors **(B)** Expression of IGF1 was lower in the old donors. older donor: age > 60, number = 10; young donor: age between 24-38, number = 20. \*\*  $P < 0.01$
